# Supplementary material for: Complex Responses of Intertidal Molluscan Embryos to a Warming and Acidifying Ocean in the Presence of UV Radiation
Source: PLoS One. 2013 Feb 6;8(2):e55939. doi: 10.1371/journal.pone.0055939 (PMC3566103; doi:10.1371/journal.pone.0055939)
Supplement: Table S1 — Outcomes of Tukeys HSD a posteriori comparison for significant Temperature×pH interactions. (DOCX) [file pone.0055939.s001.docx]

**Table S1**

Taxon Ranked sample means

*Bembicium nanum*

Mortality *‾Χ1 ‾Χ2 ‾Χ3 ‾Χ4*

Development  *‾Χ1 ‾Χ2 ‾Χ4 ‾Χ3*

*Dolabrifera brazeri*

Mortality *‾Χ1 ‾Χ2 ‾Χ3 ‾Χ4*

Development  *‾Χ1 ‾Χ2 ‾Χ4 ‾Χ3*

*Where:*

*‾Χ1 =* 22°C, pH 7.6

*‾Χ2 =* 22°C, pH 8.2

*‾Χ3 =* 26°C, pH 7.6

*‾Χ4 =* 26°C, pH 8.2
